# Supplementary material for: Exploring the time-dependent and wavelength-guided tunable binary and ternary logic behaviours of a charge-transfer probe
Source: Royal Society of Chemistry journal article supplement (doi:10.1039/d4ay01195c), 2024-01-01
Supplement: d4ay01195c1.pdf [file d4ay01195c1.pdf]

**Exploring Time-Dependent and Wavelength-Guided Tunable binary & Ternary Logic  
Behaviour of a Charge-Transfer Probe**

Monaj Karar,<sup>a</sup> Animesh Pal,<sup>b</sup> Nilanjan Dey<sup>b\*</sup>

<sup>a</sup>Department of Science and Humanities, MLR Institute of Technology, Hyderabad, Telangana-500043, India

<sup>b</sup>Department of Chemistry, Birla Institute of Technology and Science Pilani, Hyderabad, Telangana-500078, India

\*Email: nilanjandey.iisc@gmail.com, nilanjan@hyderabad.bits-pilani.ac.in

**1. EXPERIMENTAL SECTION**

**1.1. Materials and Methods:** The chemicals and solvents used in the present work, were purchased from best-known local suppliers, such as Sigma Aldrich, Alfa Acer, and used without further purification.  $^1\text{H}$  and  $^{13}\text{C}$  NMR spectra were recorded in Bruker Advance DRX 400 spectrometers operating at 400 and 100 MHz, respectively. A Perkin Elmer FT-IR spectrometer BX was used to record FT-IR spectrum. High-resolution HRMS studies were conducted using Q-TOF YA263 devices manufactured by Waters Corporation.

**1.2. Spectroscopic Studies:** All the spectroscopic studies were performed by adding 10  $\mu\text{L}$  of a DMSO solution of **1** [from a stock of 1 mM] into THF solution to reach a final volume of 1 mL. The interaction with anions ( $\text{F}^-$  and  $\text{CN}^-$ ) in THF medium was investigated under similar condition (1.5 equiv.). Thus, the DMSO concentration in final solutions remained below 1%. To observe the time-dependent response, the solutions of **1** +  $\text{F}^-$  and **1** +  $\text{CN}^-$  were incubated for 15 min. The reversibility of anion binding was tested in the presence of  $\text{H}_2\text{O}$ . The UV-vis and fluorescence spectroscopy were recorded on a Shimadzu model 2100 spectrometer and Cary Eclipse spectrofluorometer respectively. The slit-width for the fluorescence experiment was kept at 5 nm (excitation) and 5 nm (emission) and the excitation wavelength was set at 490 nm.

#### ADDITIONAL SPECTROSCOPIC DATA

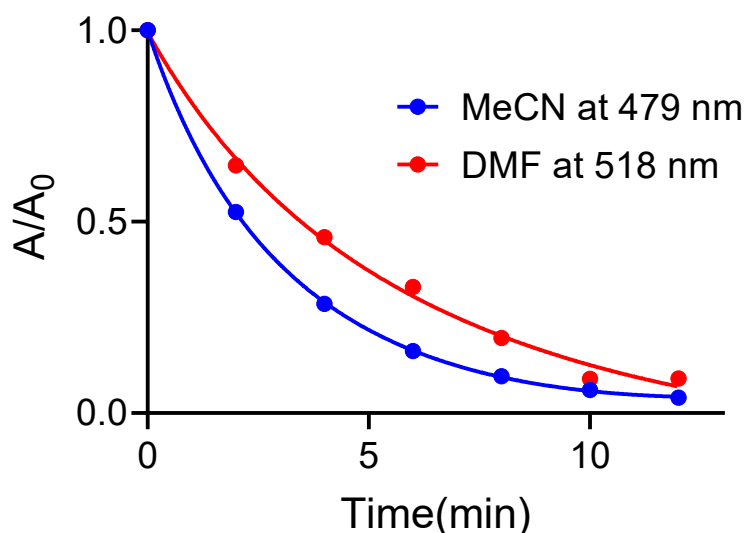

**Figure S1.** Time-dependent changes in absorbance of **1** (10  $\mu\text{M}$ ) at 479 nm and 518 nm upon addition of  $\text{CN}^-$  in MeCN and DMF medium respectively.
